# Supplementary material for: Bioactive Antioxidant Compounds from Chestnut Peels through Semi-Industrial Subcritical Water Extraction
Source: MDPI journal article supplement (doi:10.3390/antiox11050988), 2022-05-18
Supplement: s1 [file s1]

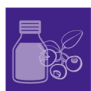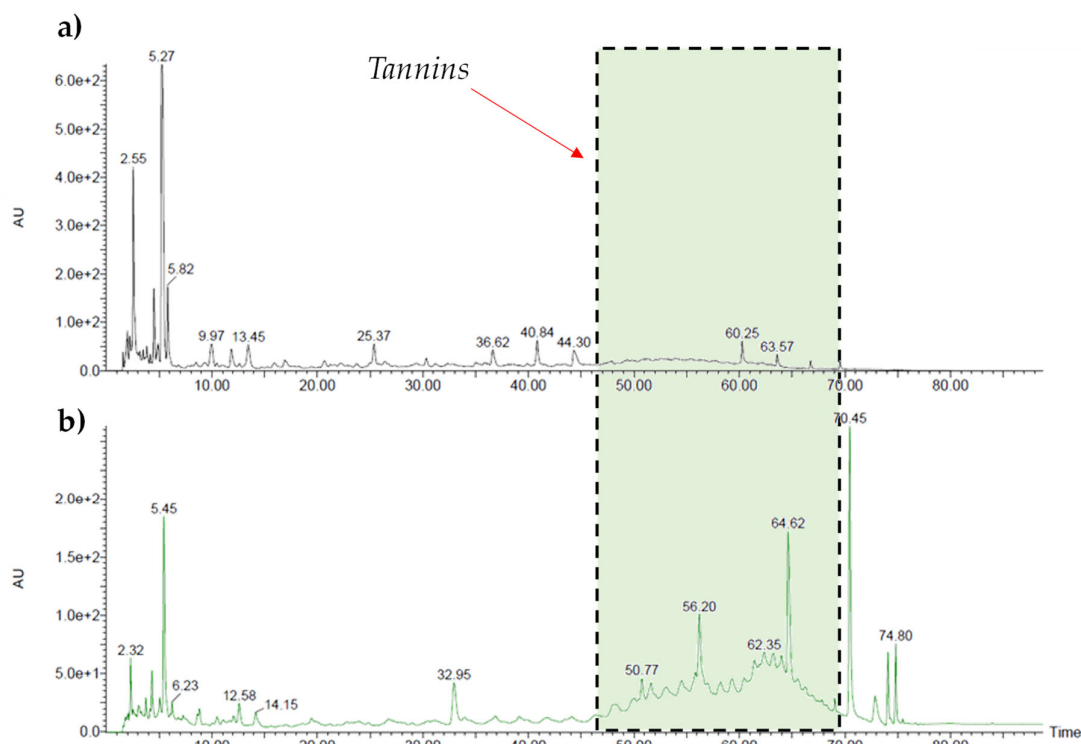

**Figure S1.** LC-MS of Chestnut peels extract, DAD chromatograms. a) sample (obtained as b), re-irradiated at 220 °C; b) extract at 150°C, 30 min.

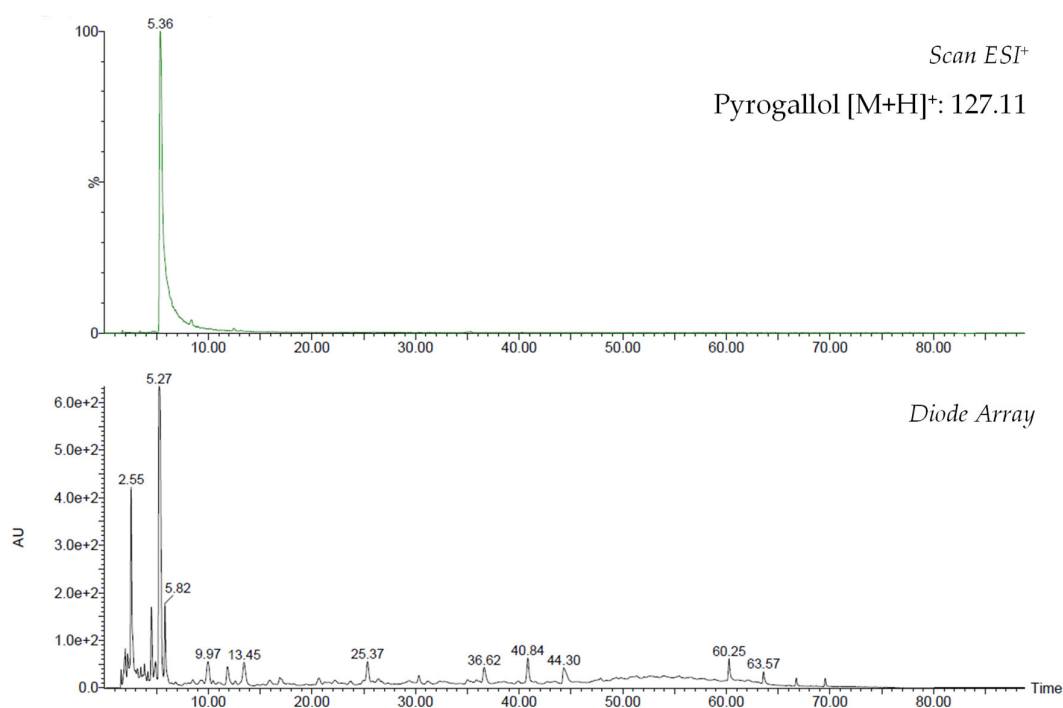

**Figure S2.** LC-MS of Chestnut peels extract re-irradiated at 220 °C. Scan ESI<sup>+</sup> for pyrogallol detection [M+H]<sup>+</sup>:127.11 and relative DAD chromatogram.

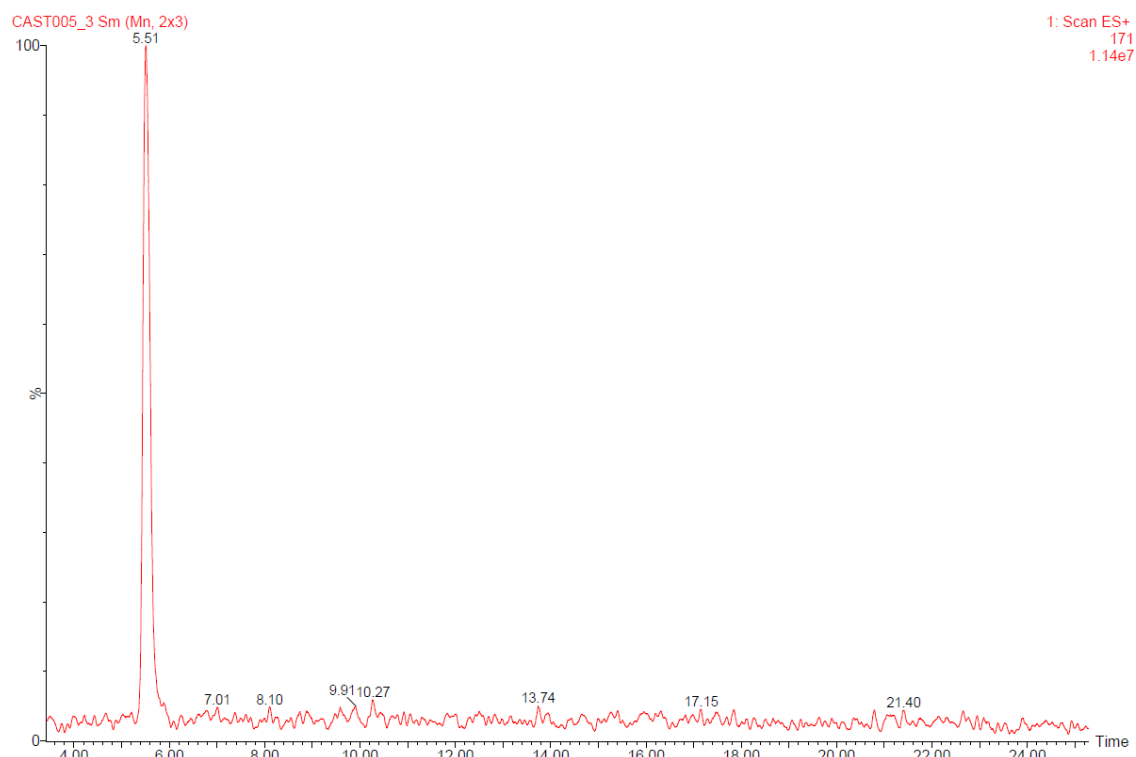

Figure S3. LC-MS of Chestnut peels extract. Scan ESI+ for gallic acid detection  $[M+H]^+$ : 171 m/z.

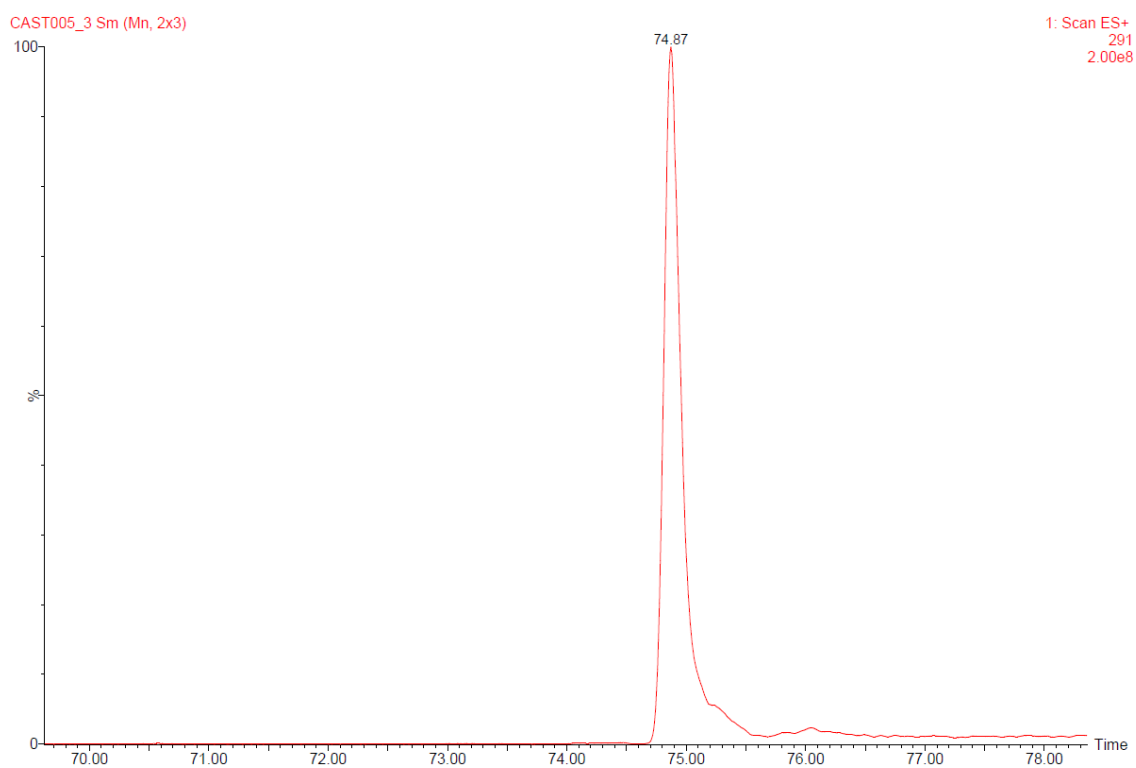

Figure S4. LC-MS of Chestnut peels extract. Scan ESI+ for catechin detection  $[M+H]^+$ : 291 m/z.

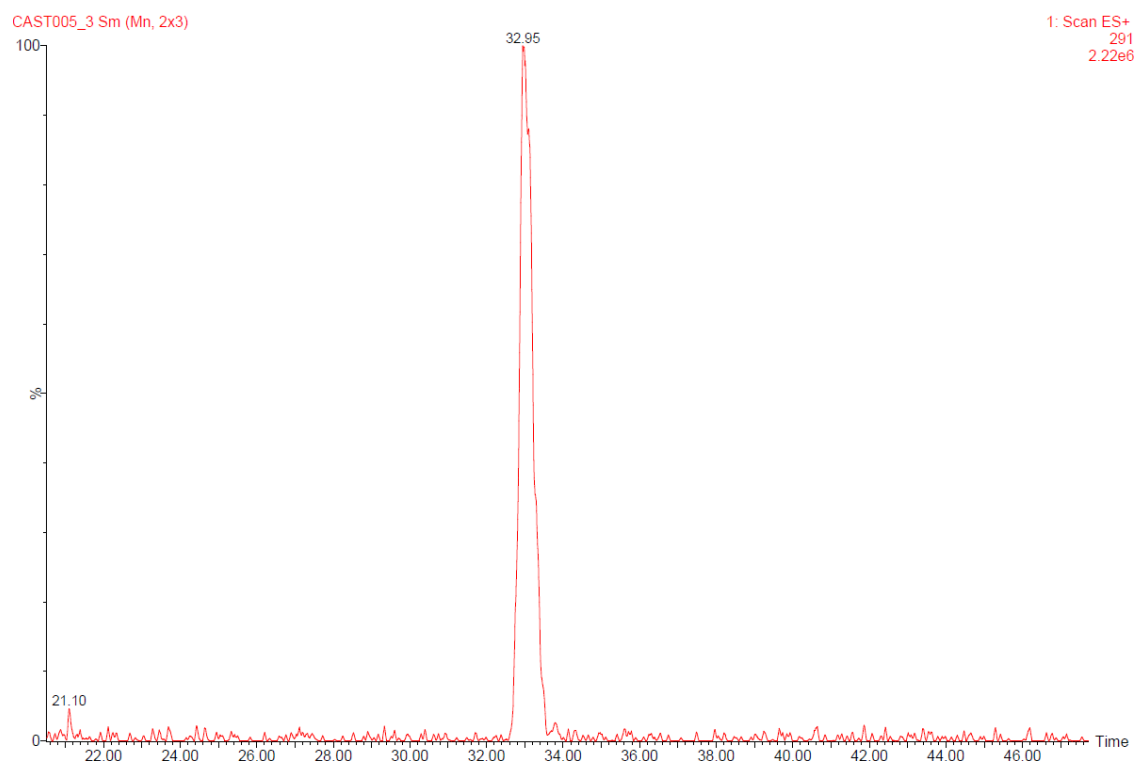

Figure S5. LC-MS of Chestnut peels extract. Scan ES+ for epicatechin detection  $[M+H]^+$ : 291 m/z.

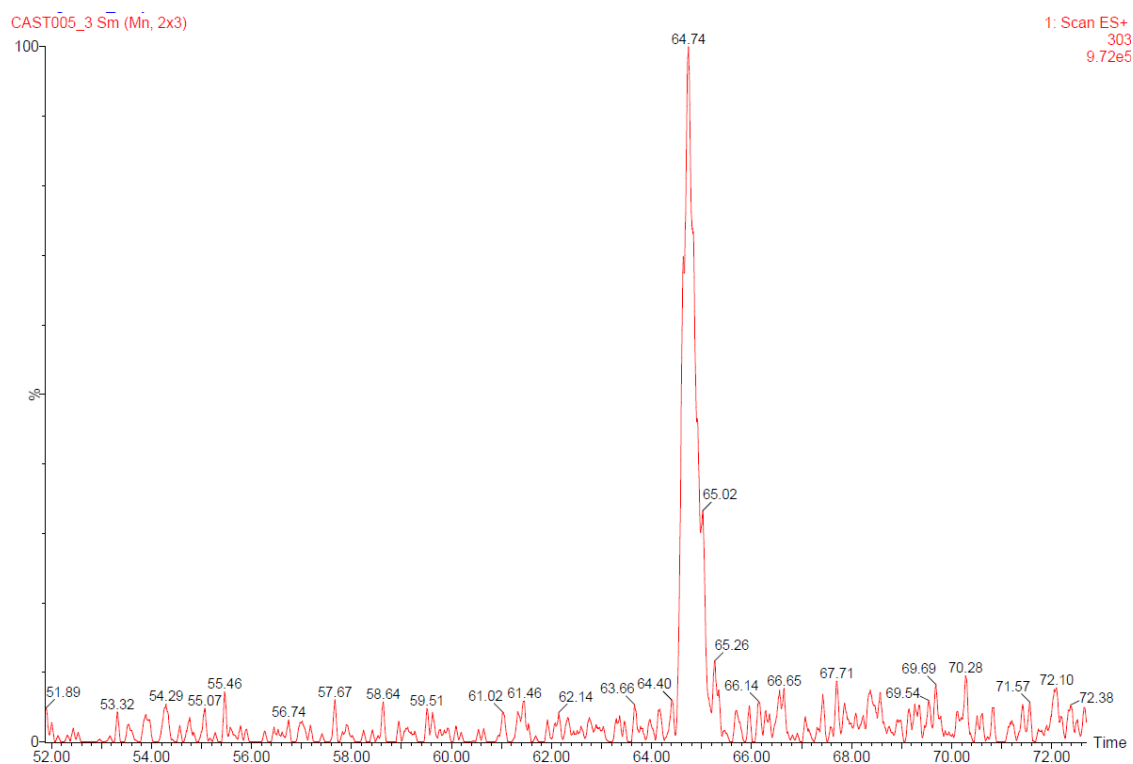

Figure S6. LC-MS of Chestnut peels extract. Scan ES+ for ellagic acid detection  $[M+H]^+$ : 303 m/z.

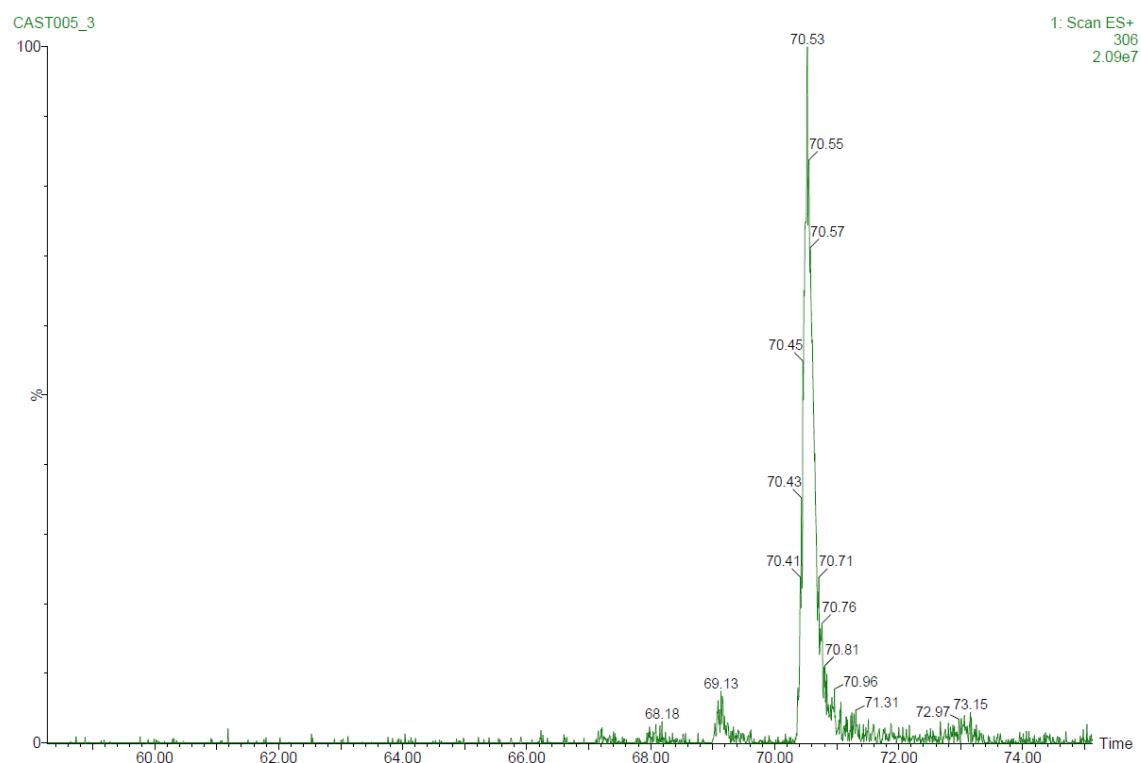

**Figure S7.** LC-MS of Chestnut peels extract. Scan ES+ for (epi)gallo catechin detection  $[M+H]^+$ : 306 m/z.

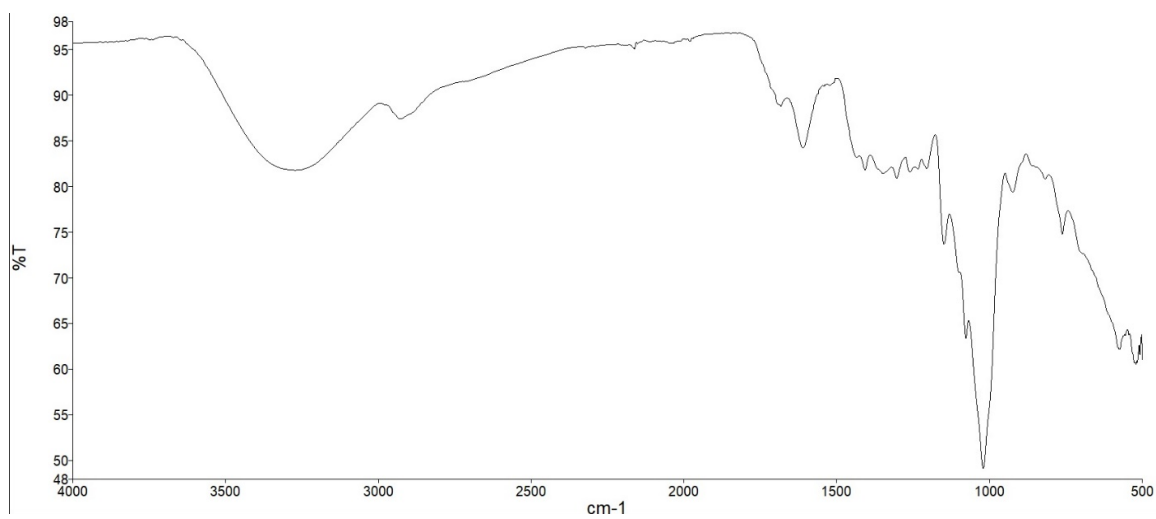

**Figure S8.** ATR: Chestnut extract.

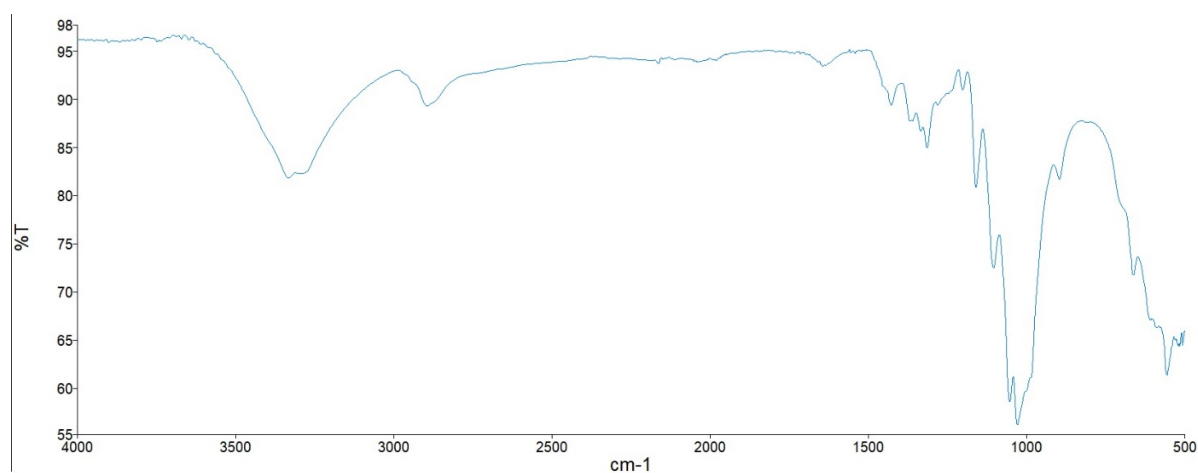

Figure S9. ATR: Avicell®.

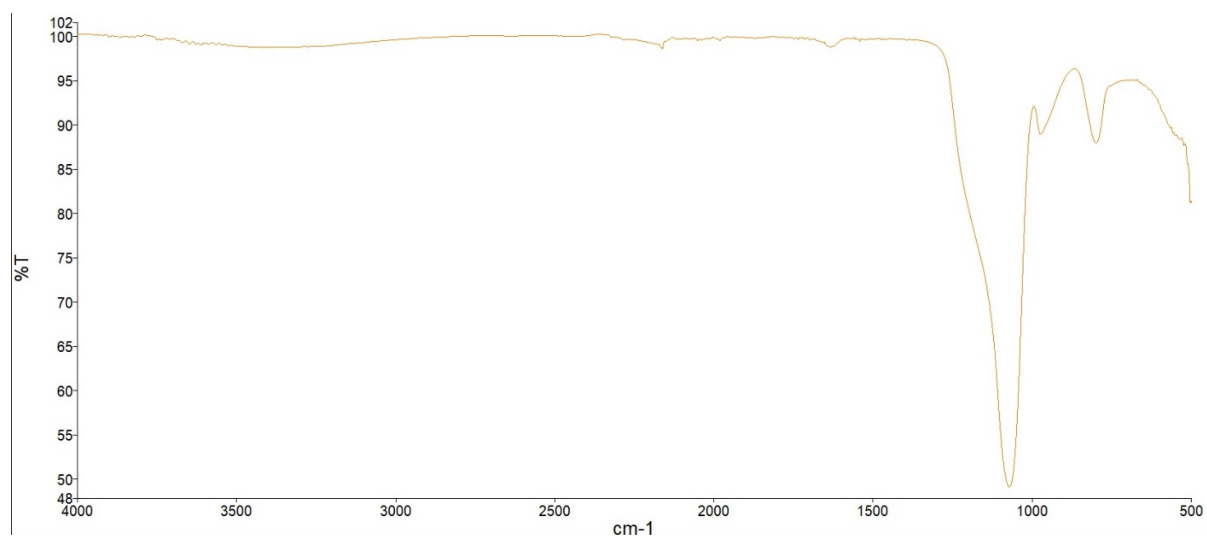

Figure S10. ATR: Syloid®.

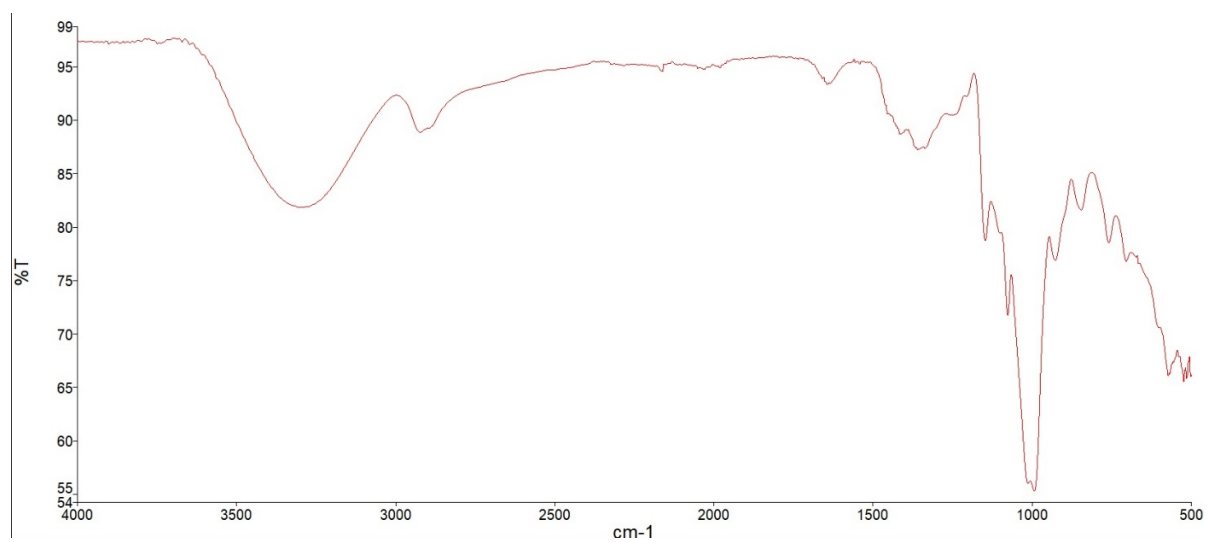

Figure S11. ATR: Maltodextrin.

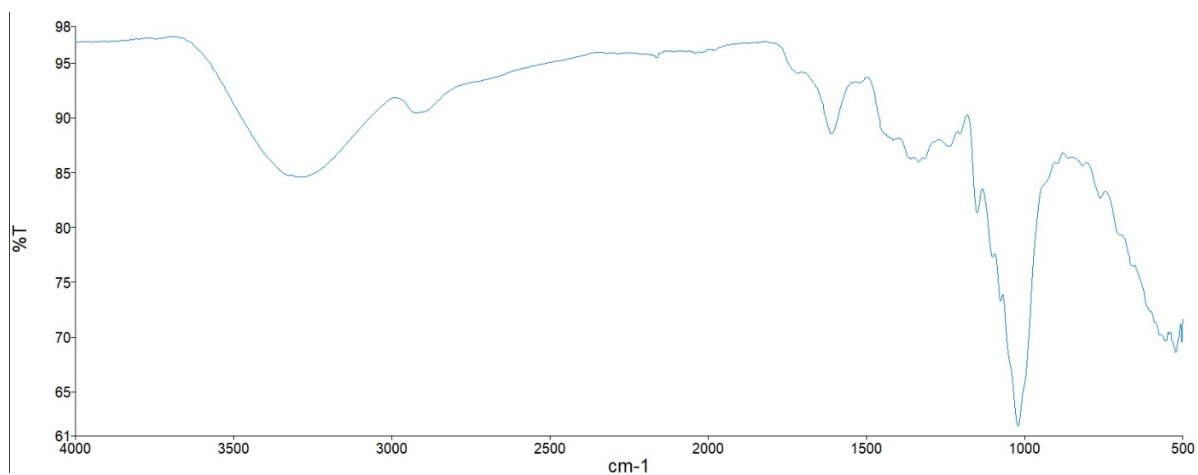

Figure S12. ATR: Formulate chestnut extract/Avicell®.

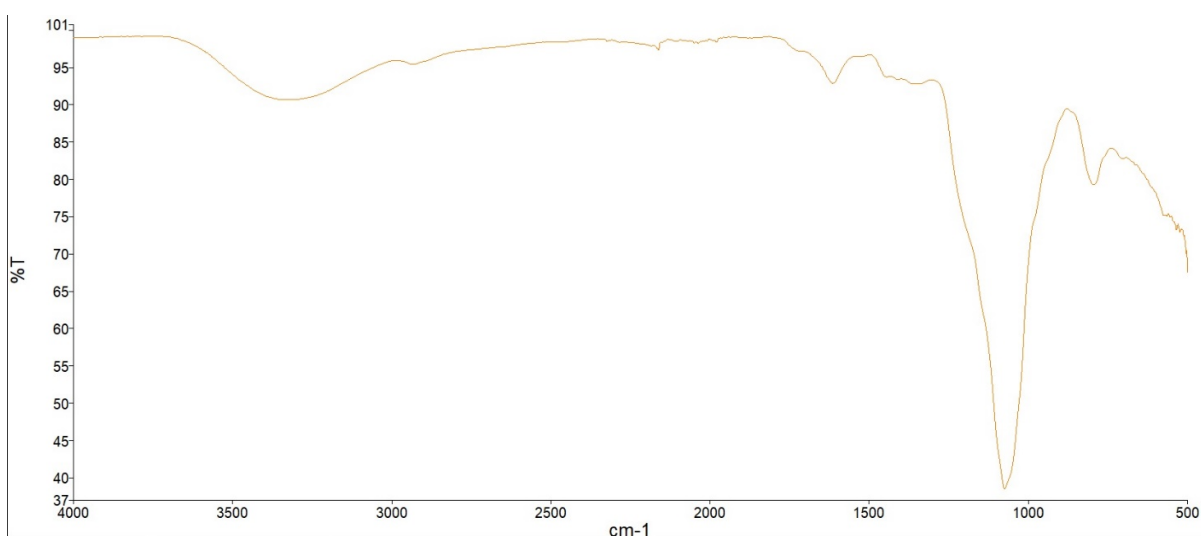

Figure S13. ATR: Formulate chestnut extract/Syloid®.

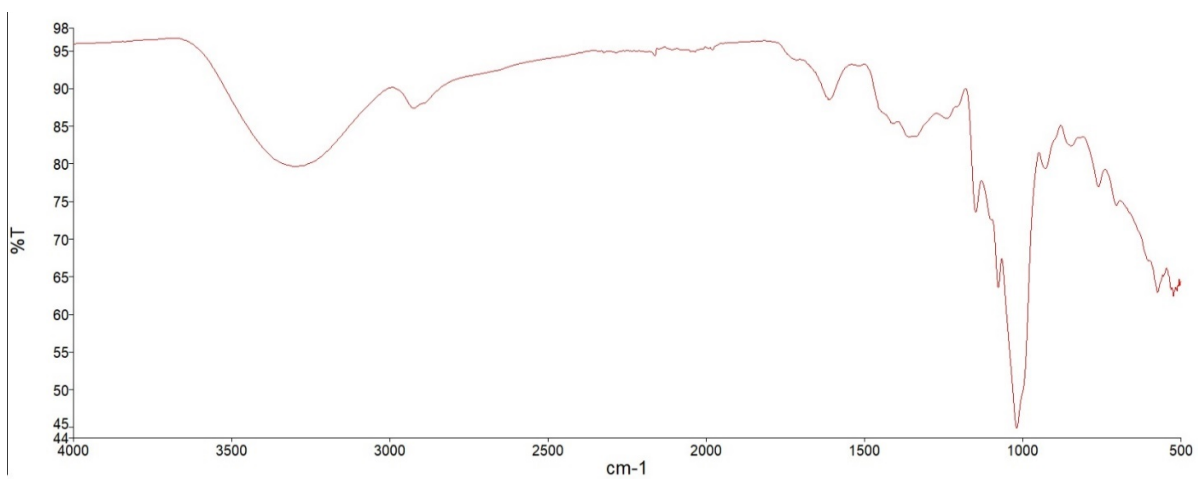

Figure S14. ATR: Formulate chestnut extract/Maltodextrin.

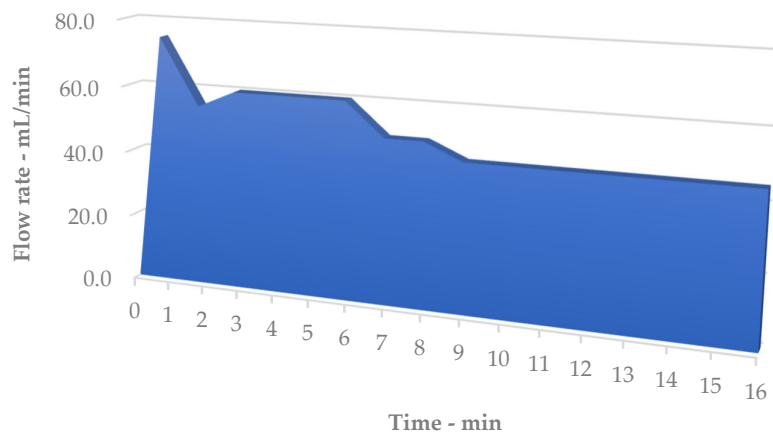

**Figure S15.** Ultrafiltration of Chestnut extract: process flow rate.

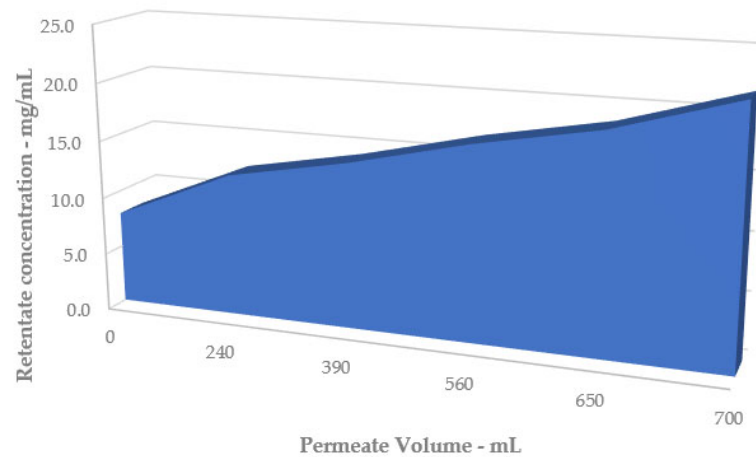

**Figure S16.** Nanofiltration of Chestnut extract: process concentration rate depending on permeate volume.
